# Supplementary material for: The Barley Chloroplast Mutator (cpm) Mutant: All Roads Lead to the Msh1 Gene
Source: MDPI journal article supplement (doi:10.3390/ijms23031814), 2022-02-05
Supplement: s1 [file s1]

Supplementary Materials

Table S1. List of primers and amplicons for sequencing the coding regions of the barley *Msh* genes.

| Gene/<br>Locus-Amplicon                            | Forward Primer                     | Reverse Primer                  | Amplicon<br>Size (bp) |
|----------------------------------------------------|------------------------------------|---------------------------------|-----------------------|
| <i>Msh1</i> /<br>HORVU2Hr1G087660.5 <sup>a</sup>   | E1F3<br>CGACTCAATCCTCCGGCG         | E10R<br>GAACCATCAAACCAGTCAAAGGA | 924                   |
|                                                    | E10F<br>TCTTGTGGGGAGAGTGCAAC       | E20R<br>AGCGCATACTGACATCGTTCA   | 1326                  |
|                                                    | E20F<br>TGCAGGATTATAGTACTGAAGAAAGC | E22R<br>TGGCTTCTCCAGAGGTTACAG   | 1222                  |
|                                                    |                                    |                                 |                       |
| <i>Msh2</i> /<br>HORVU1Hr1G030930.2 <sup>a</sup>   | E1F<br>TTTGCACACATTTGCGCGAG        | E6R<br>AGCACAGCCAAATCAGGAGA     | 1496                  |
|                                                    | E6F<br>ACAGCCATTGACCTCGATCA        | E13R<br>GGGATTACTGGCTGCGTCTT    | 1452                  |
|                                                    |                                    |                                 |                       |
| <i>Msh3</i> /<br>HORVU2Hr1G085940.3 <sup>a,e</sup> | E1F<br>CCAGAAGAGGGGAGCAGGTA        | E7R<br>TGGTAGTTTCGATCAGGTAAGCTG | 1302                  |
|                                                    | E6F<br>GCTGACCAGTTCCCGAG           | E12R<br>AGCTTCCCCTGTGCCATCC     | 1249                  |
|                                                    |                                    |                                 |                       |
| <i>Msh4</i> /<br>HORVU2Hr1G031870.3 <sup>a</sup>   | It was not amplified nor sequenced |                                 |                       |
| <i>Msh5</i> /<br>HORVU1Hr1G066830 <sup>b</sup>     | It was not amplified nor sequenced |                                 |                       |
| <i>Msh6</i> /<br>HORVU5HrG1061020 <sup>c,e</sup>   | E1F1<br>CTGTGCAGGAGGATGAGGAT       | E8R<br>TTGAAAATAGCAATGGCACCT    | 1669                  |
|                                                    | E8F1<br>TGAATCATTGTGTTACTGGATTG    | E13R1<br>GACACCAACCGTCTCCACTT   | 838                   |
|                                                    | E13F1<br>CTGCCGGTACTGGACACC        | E17R1<br>CCTGGCACGCATCTGTACT    | 1114                  |
|                                                    |                                    |                                 |                       |
| <i>Msh7</i> /<br>HORVU3Hr1G021520 <sup>d</sup>     | E1F1<br>CAGCAGCAGTCCATCCTCTC       | E5R<br>CCTCTAACTTTCGCCTGTGC     | 1460                  |
|                                                    | E5F<br>ATGGAATCTGCAGCACAGG         | E12R<br>TCATCAAGAGAGCTCAGGGTTG  | 1085                  |
|                                                    | E11F<br>CTTGGACGAGTCAGATCCAC       | E16R1<br>TGGGCGACACAGAACATC     | 1313                  |
|                                                    |                                    |                                 |                       |

- The numbers after the dots correspond to the splice variant producing the most probable protein isoform, which was used to design the primers.
- In this locus, the splice variant producing the most probable protein isoform does not correspond to any of the variants shown in Ensembl Plants database. Actually, it is a mixture of those producing isoforms 28 and 9.
- In this locus, the splice variant producing the protein isoform that was used to design the primers does not correspond to any of the variants shown in Ensembl Plants database. Actually, it is a mixture of those producing isoforms 32 and 11.
- In this locus, the splice variant producing the protein isoform that was used to design the primers does not correspond to any of the variants shown in Ensembl Plants database. Actually, it is a mixture of those producing isoforms 35 and 20.
- The proteins encoded in these loci lack the first part in comparison to the *A. thaliana* protein.

Table S2A. Prediction of the subcellular location of barley MSH proteins with TargetP-1.1.

| Protein | Mitochondrial transfer peptide | Chloroplast transfer peptide | Signal peptide to secretory pathway | Any other location | Location                    |
|---------|--------------------------------|------------------------------|-------------------------------------|--------------------|-----------------------------|
| MSH1    | 0.791                          | 0.620                        | 0.004                               | 0.006              | Mitochondria<br>Chloroplast |
| MSH2    | 0.122                          | 0.068                        | 0.044                               | 0.952              | -                           |
| MSH3*   | 0.122                          | 0.041                        | 0.030                               | 0.968              | -                           |
| MSH4    | 0.175                          | 0.103                        | 0.051                               | 0.865              | -                           |
| MSH5    | 0.503                          | 0.020                        | 0.232                               | 0.499              | Mitochondria                |
| MSH6*   | 0.045                          | 0.075                        | 0.025                               | 0.939              | -                           |
| MSH7    | 0.571                          | 0.299                        | 0.008                               | 0.076              | Mitochondria                |

\*These proteins lack the first part in comparison to the *A. thaliana* protein.

Table S2B. Prediction of the subcellular location of barley MSH proteins with TargetP-2.0.

| Protein | Mitochondrial transfer peptide | Chloroplast transfer peptide | Thylakoid luminal transfer peptide | Signal peptide to secretory pathway | Any other location |
|---------|--------------------------------|------------------------------|------------------------------------|-------------------------------------|--------------------|
| MSH1    | 0.4146                         | 0.3796                       | 0.0023                             | 0.0240                              | 0.2010             |
| MSH2    | 0                              | 0                            | 0                                  | 0                                   | 1                  |
| MSH3*   | 0                              | 0                            | 0                                  | 0.0001                              | 0.9999             |
| MSH4    | 0                              | 0                            | 0                                  | 0.0002                              | 0.9998             |
| MSH5    | 0.0001                         | 0                            | 0                                  | 0.0005                              | 0.9994             |
| MSH6*   | 0                              | 0                            | 0                                  | 0                                   | 1                  |
| MSH7    | 0.0001                         | 0                            | 0                                  | 0.0005                              | 0.9985             |

\*These proteins lack the first part in comparison to the *A. thaliana* protein.

Figure S1. Alignment of *H. vulgare*, *cpm* and control MSH1 proteins. Mismatch-recognition, ATPase and endonuclease domains are indicated by red, blue and green boxes, respectively.

|                   |                                                               |      |
|-------------------|---------------------------------------------------------------|------|
| <i>H. vulgare</i> | MQRLLASSIVAATPWLPLADSIILRRRRPRRSPLPILLFNRSWSKPTKVSRISIMVSSKA  | 60   |
| control           | MQRLLASSIVAATPWLPLADSIILRRRRPRRSPLPILLFNRSWSKPTKVSRISIMVSSKA  | 60   |
| <i>cpm</i>        | MQRLLASSIVAATPWLPLADSIILRRRRPRRSPLPILLFNRSWSKPTKVSRISIMVSSKA  | 60   |
| <i>H. vulgare</i> | NKQGDLCNEGMLSHIMWKKERMESCRKSSVQLTQRLVYSNIGLDSTLRNGSLKDGTLN    | 120  |
| control           | NKQGDLCNEGMLSHIMWKKERMESCRKSSVQLTQRLVYSNIGLDSTLRNGSLKDGTLN    | 120  |
| <i>cpm</i>        | NKQGDLCNEGMLSHIMWKKERMESCRKSSVQLTQRLVYSNIGLDSTLRNGSLKDGTLN    | 120  |
| <i>H. vulgare</i> | MEMLQFKSKFPREILLCRVGFYEAIGFDACILVEHAGLNPFGLRSDSI PKAGCPIMNL   | 180  |
| control           | MEMLQFKSKFPREILLCRVGFYEAIGFDACILVEHAGLNPFGLRSDSI PKAGCPIMNL   | 180  |
| <i>cpm</i>        | MEMLQFKSKFPREILLCRVGFYEAIGFDACILVEHAGLNPFGLRSDSI PKAGCPIMNL   | 180  |
| <i>H. vulgare</i> | RQTLDDLTRCGYSVCIVEEIQGPTQARARKGRFISGHAHPGSPYVFGLAEDHDLEFPDP   | 240  |
| control           | RQTLDDLTRCGYSVCIVEEIQGPTQARARKGRFISGHAHPGSPYVFGLAEDHDLEFPDP   | 240  |
| <i>cpm</i>        | RQTLDDLTRCGYSVCIVEEIQGPTQARARKGRFISGHAHPGSPYVFGLAEDHDLEFPDP   | 240  |
| <i>H. vulgare</i> | MPVVGISRSAGYCLISVLEMTKTYSAEGLTEEAUVTKLRICRYHLYLHSSLRNNSG      | 300  |
| control           | MPVVGISRSAGYCLISVLEMTKTYSAEGLTEEAUVTKLRICRYHLYLHSSLRNNSG      | 300  |
| <i>cpm</i>        | MPVVGISRSAGYCLISVLEMTKTYSAEGLTEEAUVTKLRICRYHLYLHSSLRNNSG      | 300  |
| <i>H. vulgare</i> | TSRWGEFGEGLLWGEANGKSFDFWFGSPIDEILLCKVREIYGLDEKTSFRNVTISLEGRP  | 360  |
| control           | TSRWGEFGEGLLWGEANGKSFDFWFGSPIDEILLCKVREIYGLDEKTSFRNVTISLEGRP  | 360  |
| <i>cpm</i>        | TSRWGEFGEGLLWGEANGKSFDFWFGSPIDEILLCKVREIYGLDEKTSFRNVTISLEGRP  | 360  |
| <i>H. vulgare</i> | QPLYLTATQIGVITPTEGIPSLPKMLLPNCAGLPSMYIRDLLNPPSFDVASAIQACR     | 420  |
| control           | QPLYLTATQIGVITPTEGIPSLPKMLLPNCAGLPSMYIRDLLNPPSFDVASAIQACR     | 420  |
| <i>cpm</i>        | QPLYLTATQIGVITPTEGIPSLPKMLLPNCAGLPSMYIRDLLNPPSFDVASAIQACR     | 420  |
| <i>H. vulgare</i> | IMCSITCSIPEFTCIPSALVKLESKEVNHIEFCRIKVLDEIMLMNGNTELSAIQNK      | 480  |
| control           | IMCSITCSIPEFTCIPSALVKLESKEVNHIEFCRIKVLDEIMLMNGNTELSAIQNK      | 480  |
| <i>cpm</i>        | IMCSITCSIPEFTCIPSALVKLESKEVNHIEFCRIKVLDEIMLMNGNTELSAIQNK      | 480  |
| <i>H. vulgare</i> | LEPASVVTGLKVDADILIKECRFISKRIGEVISLAGESDQAISSEYIPKEFFNDMESSW   | 540  |
| control           | LEPASVVTGLKVDADILIKECRFISKRIGEVISLAGESDQAISSEYIPKEFFNDMESSW   | 540  |
| <i>cpm</i>        | LEPASVVTGLKVDADILIKECRFISKRIGEVISLAGESDQAISSEYIPKEFFNDMESSW   | 540  |
| <i>H. vulgare</i> | KGRVKRVHAEFESFNVDAQAALSTAVTEDFLPIIVRVKSVMSHGSSKGEISYAKEHGA    | 600  |
| control           | KGRVKRVHAEFESFNVDAQAALSTAVTEDFLPIIVRVKSVMSHGSSKGEISYAKEHGA    | 600  |
| <i>cpm</i>        | KGRVKRVHAEFESFNVDAQAALSTAVTEDFLPIIVRVKSVMSHGSSKGEISYAKEHGA    | 600  |
| <i>H. vulgare</i> | VWFKGRRFTPNVWANTPGEEQIKQLKPAIDSKGRVGEWFTTTKVENALARYHEACDNA    | 660  |
| control           | VWFKGRRFTPNVWANTPGEEQIKQLKPAIDSKGRVGEWFTTTKVENALARYHEACDNA    | 660  |
| <i>cpm</i>        | VWFKGRRFTPNVWANTPGEEQIKQLKPAIDSKGRVGEWFTTTKVENALARYHEACDNA    | 660  |
| <i>H. vulgare</i> | KGKVLLELLRGLSSELQDKINILVFCSTLLIITKALFGHVSEGLRRGWLPPIYPLSKDYS  | 720  |
| control           | KGKVLLELLRGLSSELQDKINILVFCSTLLIITKALFGHVSEGLRRGWLPPIYPLSKDYS  | 720  |
| <i>cpm</i>        | KGKVLLELLRGLSSELQDKINILVFCSTLLIITKALFGHVSEGLRRGWLPPIYPLSKDYS  | 720  |
| <i>H. vulgare</i> | TEESSEMDDLGLFPYWLNTNQGNAILNDVSMRSLFILTGPNGGGKSSMLRSVCAALLG    | 780  |
| control           | TEESSEMDDLGLFPYWLNTNQGNAILNDVSMRSLFILTGPNGGGKSSMLRSVCAALLG    | 780  |
| <i>cpm</i>        | TEESSEMDDLGLFPYWLNTNQGNAILNDVSMRSLFILTGPNGGGKSSMLRSVCAALLG    | 780  |
| <i>H. vulgare</i> | VCGLMVPAASAVIPHFDSIMLHMAYDSPADGKSSFIEMSEIRSLVSRATGRSLVLIDE    | 840  |
| control           | VCGLMVPAASAVIPHFDSIMLHMAYDSPADGKSSFIEMSEIRSLVSRATGRSLVLIDE    | 840  |
| <i>cpm</i>        | VCGLMVPAASAVIPHFDSIMLHMAYDSPADGKSSFIEMSEIRSLVSRATGRSLVLIDE    | 840  |
| <i>H. vulgare</i> | ICRGITETAKGTCIAGSIIERLDDAGCLGIVSTHLHGFIDLPLSLNNTDFKAMGTEWVNGY | 900  |
| control           | ICRGITETAKGTCIAGSIIERLDDAGCLGIVSTHLHGFIDLPLSLNNTDFKAMGTEWVNGY | 900  |
| <i>cpm</i>        | ICRGITETAKGTCIAGSIIERLDDAGCLGIVSTHLHGFIDLPLSLNNTDFKAMGTEWVNGY | 900  |
| <i>H. vulgare</i> | IQPTWRLMDGICRESLAFQTARKEGMPDLIIKRAEELYLNMSRNKHTSLTLHPIVANS    | 960  |
| control           | IQPTWRLMDGICRESLAFQTARKEGMPDLIIKRAEELYLNMSRNKHTSLTLHPIVANS    | 960  |
| <i>cpm</i>        | IQPTWRLMDGICRESLAFQTARKEGMPDLIIKRAEELYLNMSRNKHTSLTLHPIVANS    | 960  |
| <i>H. vulgare</i> | SVNGGLVDRPDGLNGLEPPTGSFGLLRKDVEISIVTAICEDKLLDLNKRISIEQVEVVC   | 1020 |
| control           | SVNGGLVDRPDGLNGLEPPTGSFGLLRKDVEISIVTAICEDKLLDLNKRISIEQVEVVC   | 1020 |
| <i>cpm</i>        | SVNGGLVDRPDGLNGLEPPTGSFGLLRKDVEISIVTAICEDKLLDLNKRISIEQVEVVC   | 1020 |
| <i>H. vulgare</i> | VIVGAREQPPSTVGRSSIIYIIIRDNKLYVGQTDLLVGRGLGAHRSKEGMQDATILYIVV  | 1080 |
| control           | VIVGAREQPPSTVGRSSIIYIIIRDNKLYVGQTDLLVGRGLGAHRSKEGMQDATILYIVV  | 1080 |
| <i>cpm</i>        | VIVGAREQPPSTVGRSSIIYIIIRDNKLYVGQTDLLVGRGLGAHRSKEGMQDATILYIVV  | 1080 |
| <i>H. vulgare</i> | PGKSVACQLETLLINQLPSKGFKLTKADGKHNFMSVTSGEAMAAH                 | 1128 |
| control           | PGKSVACQLETLLINQLPSKGFKLTKADGKHNFMSVTSGEAMAAH                 | 1128 |
| <i>cpm</i>        | PGKSVACQLETLLINQLPSKGFKLTKADGKHNFMSVTSGEAMAAH                 | 601  |
